# Supplementary material for: Addition of Coriander during Fermentation of Korean Soy Sauce (Gangjang) Causes Significant Shift in Microbial Composition and Reduction in Biogenic Amine Levels
Source: PubMed Central journal article supplement (PMC7598154; doi:10.3390/foods9101346), 2020-09-23
Supplement: foods-09-01346-s001.pdf [file foods-09-01346-s001.pdf]

**Table S1.** Results of the high throughput sequencing representing the total bases, read count, GC%, Q20% and Q30%

| Sample | Total bases | Read count | GC (%) | Q20 (%) | Q30 (%) |
|--------|-------------|------------|--------|---------|---------|
| SSC1   | 118032650   | 254073     | 54.55  | 98.76   | 95.65   |
| SSC2   | 111544163   | 240129     | 54.90  | 98.75   | 95.76   |
| SSC3   | 117945445   | 253943     | 54.35  | 98.86   | 95.99   |
| SST1   | 95979498    | 206738     | 53.38  | 98.76   | 95.54   |
| SST2   | 114442144   | 246468     | 53.35  | 98.77   | 95.68   |
| SST3   | 80305492    | 172912     | 53.36  | 98.74   | 95.57   |

SSC, soy sauce control; SST, soy sauce prepared by adding coriander during soy bean fermentation.
